# Supplementary material
Source: MDPI journal article supplement (https://www.mdpi.com/2039-4713/14/1/23)
Supplement: s1 [file s1]

# Air Pollution and Primary DNA Damage among Zagreb (Croatia) Residents: A Cross-Sectional Study

Table S1. Mean tail length.

|             | Previous day |            |           | 3 previous days |            |           | 7 previous days |            |           |
|-------------|--------------|------------|-----------|-----------------|------------|-----------|-----------------|------------|-----------|
|             | PM           | PM+ metals | PM+ other | PM              | PM+ metals | PM+ other | PM              | PM+ metals | PM+ other |
| Temperature |              |            |           |                 |            |           |                 |            |           |
| <2°         | -            | -          | -         | -               | -          | -         | -               | -          | -         |
| 2°-<10°     |              |            |           |                 |            |           |                 |            |           |
| Coefficient | 0.004        | 0.005      | 0.004     | 0.012           | 0.011      | 0.009     | 0.010           | 0.008      | 0.007     |
| p-value     | 0.816        | 0.761      | 0.807     | 0.506           | 0.528      | 0.585     | 0.570           | 0.733      | 0.669     |
| 10°-<18°    |              |            |           |                 |            |           |                 |            |           |
| Coefficient | 0.022        | 0.031      | 0.021     | 0.032           | 0.040      | 0.041     | 0.031           | 0.028      | 0.037     |
| p-value     | 0.228        | 0.160      | 0.260     | 0.064           | 0.041      | 0.024     | 0.077           | 0.234      | 0.050     |
| >18°        |              |            |           |                 |            |           |                 |            |           |
| Coefficient | 0.026        | 0.030      | 0.024     | 0.043           | 0.041      | 0.063     | 0.040           | 0.038      | 0.052     |
| p-value     | 0.195        | 0.231      | 0.294     | 0.052           | 0.092      | 0.016     | 0.066           | 0.175      | 0.047     |
| F1          |              |            |           |                 |            |           |                 |            |           |
| Coefficient | 0.002        | 0.009      | -0.004    | 0.037           | 0.061      | 0.047     | 0.035           | 0.033      | 0.037     |
| p-value     | 0.939        | 0.729      | 0.901     | 0.264           | 0.067      | 0.160     | 0.340           | 0.385      | 0.316     |
| F2          |              |            |           |                 |            |           |                 |            |           |
| Coefficient |              | -0.035     |           |                 | -0.050     |           |                 | 0.010      |           |
| p-value     |              | 0.161      |           |                 | 0.088      |           |                 | 0.805      |           |
| F4          |              |            |           |                 |            |           |                 |            |           |
| Coefficient |              | -0.046     |           |                 | -0.109     |           |                 | 0.010      |           |
| p-value     |              | 0.146      |           |                 | 0.018      |           |                 | 0.864      |           |
| F3          |              |            |           |                 |            |           |                 |            |           |
| Coefficient |              |            | -0.003    |                 |            | 0.035     |                 |            | 0.026     |
| p-value     |              |            | 0.885     |                 |            | 0.172     |                 |            | 0.413     |

Linear mixed models (one model per column) of the log10 transformed mean tail length as a function of factor scores of the exposure measurements adjusted on the temperature.

**Table S2.** Mean tail intensity

|             | Previous day |            |           | 3 previous days |            |           | 7 previous days |            |           |
|-------------|--------------|------------|-----------|-----------------|------------|-----------|-----------------|------------|-----------|
|             | PM           | PM+ metals | PM+ other | PM              | PM+ metals | PM+ other | PM              | PM+ metals | PM+ other |
| Temperature |              |            |           |                 |            |           |                 |            |           |
| <2°         | -            | -          | -         | -               | -          | -         | -               | -          | -         |
| 2°-<10°     |              |            |           |                 |            |           |                 |            |           |
| Coefficient | -0.066       | -0.032     | -0.053    | -0.034          | -0.011     | -0.028    | -0.032          | 0.000      | -0.017    |
| p-value     | 0.460        | 0.723      | 0.541     | 0.710           | 0.901      | 0.756     | 0.717           | 0.997      | 0.853     |
| 10°-<18°    |              |            |           |                 |            |           |                 |            |           |
| Coefficient | 0.036        | 0.155      | -0.007    | 0.088           | 0.191      | 0.076     | 0.086           | 0.142      | 0.060     |
| p-value     | 0.715        | 0.194      | 0.946     | 0.357           | 0.066      | 0.456     | 0.374           | 0.272      | 0.561     |
| >18°        |              |            |           |                 |            |           |                 |            |           |
| Coefficient | 0.118        | 0.231      | 0.019     | 0.196           | 0.248      | 0.170     | 0.187           | 0.224      | 0.128     |
| p-value     | 0.271        | 0.084      | 0.873     | 0.107           | 0.054      | 0.247     | 0.115           | 0.140      | 0.376     |
| F1          |              |            |           |                 |            |           |                 |            |           |
| Coefficient | -0.098       | -0.009     | -0.191    | 0.055           | 0.216      | 0.030     | 0.079           | 0.125      | 0.066     |
| p-value     | 0.475        | 0.950      | 0.182     | 0.751           | 0.203      | 0.868     | 0.681           | 0.523      | 0.728     |
| F2          |              |            |           |                 |            |           |                 |            |           |
| Coefficient |              | -0.256     |           |                 | -0.411     |           |                 | -0.180     |           |
| p-value     |              | 0.043      |           |                 | 0.006      |           |                 | 0.382      |           |
| F4          |              |            |           |                 |            |           |                 |            |           |
| Coefficient |              | -0.116     |           |                 | -0.556     |           |                 | -0.244     |           |
| p-value     |              | 0.473      |           |                 | 0.017      |           |                 | 0.424      |           |
| F3          |              |            |           |                 |            |           |                 |            |           |
| Coefficient |              |            | -0.183    |                 |            | -0.089    |                 |            | -0.175    |
| p-value     |              |            | 0.079     |                 |            | 0.511     |                 |            | 0.278     |

Linear mixed models (one model per column) of the log10 transformed mean tail intensity as a function of factor scores of the exposure measurements adjusted on the temperature.

**Table S3.** Mean tail moment

|             | Previous day |            |           | 3 previous days |            |           | 7 previous days |            |           |
|-------------|--------------|------------|-----------|-----------------|------------|-----------|-----------------|------------|-----------|
|             | PM           | PM+ metals | PM+ other | PM              | PM+ metals | PM+ other | PM              | PM+ metals | PM+ other |
| Temperature |              |            |           |                 |            |           |                 |            |           |
| <2°         | -            | -          | -         | -               | -          | -         | -               | -          | -         |
| 2°-<10°     |              |            |           |                 |            |           |                 |            |           |
| Coefficient | -0.039       | 0.000      | -0.027    | -0.003          | 0.023      | -0.000    | -0.008          | 0.032      | 0.003     |
| p-value     | 0.676        | 0.996      | 0.771     | 0.976           | 0.802      | 1.000     | 0.929           | 0.790      | 0.977     |
| 10°-<18°    |              |            |           |                 |            |           |                 |            |           |
| Coefficient | 0.036        | 0.155      | -0.007    | 0.088           | 0.191      | 0.076     | 0.086           | 0.142      | 0.060     |
| p-value     | 0.715        | 0.194      | 0.946     | 0.357           | 0.066      | 0.456     | 0.374           | 0.272      | 0.561     |
| >18°        |              |            |           |                 |            |           |                 |            |           |
| Coefficient | 0.118        | 0.231      | 0.019     | 0.196           | 0.248      | 0.170     | 0.187           | 0.224      | 0.128     |
| p-value     | 0.271        | 0.084      | 0.873     | 0.107           | 0.054      | 0.247     | 0.115           | 0.140      | 0.376     |
| F1          |              |            |           |                 |            |           |                 |            |           |
| Coefficient | -0.053       | 0.045      | -0.145    | 0.126           | 0.295      | 0.112     | 0.123           | 0.165      | 0.066     |
| p-value     | 0.713        | 0.760      | 0.342     | 0.494           | 0.100      | 0.550     | 0.543           | 0.424      | 0.728     |
| F2          |              |            |           |                 |            |           |                 |            |           |
| Coefficient |              | -0.280     |           |                 | -0.430     |           |                 | -0.178     |           |
| p-value     |              | 0.036      |           |                 | 0.006      |           |                 | 0.411      |           |
| F4          |              |            |           |                 |            |           |                 |            |           |
| Coefficient |              | -0.118     |           |                 | -0.580     |           |                 | -0.185     |           |
| p-value     |              | 0.491      |           |                 | 0.019      |           |                 | 0.566      |           |
| F3          |              |            |           |                 |            |           |                 |            |           |
| Coefficient |              |            | -0.178    |                 |            | -0.046    |                 |            | -0.122    |
| p-value     |              |            | 0.106     |                 |            | 0.747     |                 |            | 0.477     |

Linear mixed models (one model per column) of the log10 transformed mean tail moment as a function of factor scores of the exposure measurements adjusted on the temperature.

**Table S4.** LTN numbers tail length above 95%

|               | Previous day |            |           | 3 previous days |            |           | 7 previous days |            |           |
|---------------|--------------|------------|-----------|-----------------|------------|-----------|-----------------|------------|-----------|
|               | PM           | PM+ metals | PM+ other | PM              | PM+ metals | PM+ other | PM              | PM+ metals | PM+ other |
| Sampling Year |              |            |           |                 |            |           |                 |            |           |
| 2011          | -            | -          | -         | -               | -          | -         | -               | -          | -         |
| 2012          |              |            |           |                 |            |           |                 |            |           |
| Coefficient   | -0.113       | -0.059     | 0.101     | -0.363          | -0.484     | -0.319    | -0.095          | -0.414     | 0.016     |
| p-value       | 0.852        | 0.922      | 0.866     | 0.562           | 0.422      | 0.626     | 0.872           | 0.481      | 0.979     |
| 2013          |              |            |           |                 |            |           |                 |            |           |
| Coefficient   | 0.576        | 0.364      | 0.973     | 0.577           | 0.247      | 0.672     | 0.536           | 0.618      | 0.761     |
| p-value       | 0.368        | 0.593      | 0.140     | 0.358           | 0.692      | 0.371     | 0.398           | 0.333      | 0.278     |
| 2014          |              |            |           |                 |            |           |                 |            |           |
| Coefficient   | -0.905       | -0.801     | -0.739    | -0.924          | -0.774     | -0.905    | -0.867          | -1.114     | -0.806    |
| p-value       | 0.002        | 0.006      | 0.015     | 0.002           | 0.006      | 0.003     | 0.004           | 0.000      | 0.009     |
| 2015          |              |            |           |                 |            |           |                 |            |           |
| Coefficient   | 0.795        | 0.874      | 1.415     | 0.744           | 0.836      | 0.849     | 0.843           | 0.894      | 1.169     |
| p-value       | 0.105        | 0.067      | 0.018     | 0.126           | 0.069      | 0.204     | 0.086           | 0.054      | 0.078     |
| Temperature   |              |            |           |                 |            |           |                 |            |           |
| <2°           | -            | -          | -         | -               | -          | -         | -               | -          | -         |
| 2°-<10°       |              |            |           |                 |            |           |                 |            |           |
| Coefficient   | 0.218        | 0.267      | 0.235     | 0.413           | 0.433      | 0.417     | 0.278           | 1.042      | 0.341     |
| p-value       | 0.640        | 0.565      | 0.601     | 0.380           | 0.341      | 0.376     | 0.540           | 0.075      | 0.457     |
| 10°-<18°      |              |            |           |                 |            |           |                 |            |           |
| Coefficient   | 1.239        | 1.615      | 1.057     | 1.461           | 1.773      | 1.419     | 1.352           | 2.112      | 1.249     |
| p-value       | 0.012        | 0.005      | 0.030     | 0.002           | 0.001      | 0.005     | 0.004           | 0.001      | 0.011     |
| >18°          |              |            |           |                 |            |           |                 |            |           |
| Coefficient   | 1.364        | 1.683      | 0.886     | 1.782           | 1.881      | 1.678     | 1.579           | 2.583      | 1.290     |
| p-value       | 0.008        | 0.010      | 0.118     | 0.002           | 0.003      | 0.022     | 0.004           | 0.000      | 0.056     |
| F1            |              |            |           |                 |            |           |                 |            |           |
| Coefficient   | 0.187        | 0.471      | -0.331    | 1.139           | 1.776      | 1.064     | 0.789           | 0.600      | 0.789     |
| p-value       | 0.772        | 0.470      | 0.632     | 0.192           | 0.039      | 0.252     | 0.389           | 0.502      | 0.386     |
| F2            |              |            |           |                 |            |           |                 |            |           |
| Coefficient   |              | -1.153     |           |                 | -1.691     |           |                 | -0.844     |           |
| p-value       |              | 0.057      |           |                 | 0.020      |           |                 | 0.401      |           |
| F4            |              |            |           |                 |            |           |                 |            |           |
| Coefficient   |              | -0.701     |           |                 | -2.570     |           |                 | 2.832      |           |
| p-value       |              | 0.420      |           |                 | 0.037      |           |                 | 0.064      |           |
| F3            |              |            |           |                 |            |           |                 |            |           |
| Coefficient   |              |            | -1.077    |                 |            | -0.209    |                 |            | -0.764    |
| p-value       |              |            | 0.086     |                 |            | 0.818     |                 |            | 0.468     |

Mixed Poisson models (one model per column) of the number of cells above the 95<sup>th</sup> percentile of the tail length (LTN) as a function of factor scores of the exposure measurements adjusted on the temperature and the sampling year.

**Table S5.** AST numbers intensity above 95%

|                 | Previous day |            |           | 3 previous days |            |           | 7 previous days |            |           |
|-----------------|--------------|------------|-----------|-----------------|------------|-----------|-----------------|------------|-----------|
|                 | PM           | PM+ metals | PM+ other | PM              | PM+ metals | PM+ other | PM              | PM+ metals | PM+ other |
| Gender          |              |            |           |                 |            |           |                 |            |           |
| Female          | -            | -          | -         | -               | -          | -         | -               | -          | -         |
| Male            |              |            |           |                 |            |           |                 |            |           |
| Coefficient     | 0.155        | 0.164      | 0.151     | 0.159           | 0.175      | 0.159     | 0.160           | 0.159      | 0.160     |
| p-value         | 0.049        | 0.037      | 0.055     | 0.043           | 0.026      | 0.043     | 0.042           | 0.044      | 0.042     |
| Body mass index |              |            |           |                 |            |           |                 |            |           |
| Healthy         | -            | -          | -         | -               | -          | -         | -               | -          | -         |
| Overweight      |              |            |           |                 |            |           |                 |            |           |
| Coefficient     | -0.028       | -0.027     | -0.026    | -0.029          | -0.034     | -0.029    | -0.029          | -0.030     | -0.029    |
| p-value         | 0.741        | 0.754      | 0.761     | 0.738           | 0.692      | 0.735     | 0.732           | 0.724      | 0.735     |
| Obese           |              |            |           |                 |            |           |                 |            |           |
| Coefficient     | -0.145       | -0.158     | -0.135    | -0.149          | -0.156     | -0.151    | -0.146          | -0.147     | -0.144    |
| p-value         | 0.319        | 0.276      | 0.356     | 0.308           | 0.281      | 0.304     | 0.315           | 0.313      | 0.327     |
| Temperature     |              |            |           |                 |            |           |                 |            |           |
| <2°             | -            | -          | -         | -               | -          | -         | -               | -          | -         |
| 2°-<10°         |              |            |           |                 |            |           |                 |            |           |
| Coefficient     | -0.270       | -0.115     | -0.234    | -0.178          | 0.004      | -0.184    | -0.112          | -0.178     | -0.101    |
| p-value         | 0.409        | 0.720      | 0.473     | 0.602           | 0.991      | 0.593     | 0.733           | 0.702      | 0.764     |
| 10°-<18°        |              |            |           |                 |            |           |                 |            |           |
| Coefficient     | -0.090       | 0.389      | -0.188    | 0.060           | 0.512      | 0.080     | 0.173           | 0.112      | 0.150     |
| p-value         | 0.793        | 0.336      | 0.599     | 0.860           | 0.184      | 0.831     | 0.612           | 0.824      | 0.686     |
| >18°            |              |            |           |                 |            |           |                 |            |           |
| Coefficient     | 0.286        | 0.744      | 0.083     | 0.469           | 0.810      | 0.508     | 0.634           | 0.545      | 0.587     |
| p-value         | 0.430        | 0.095      | 0.844     | 0.276           | 0.085      | 0.334     | 0.119           | 0.334      | 0.247     |
| F1              |              |            |           |                 |            |           |                 |            |           |
| Coefficient     | -0.292       | 0.066      | -0.477    | 0.142           | 0.809      | 0.162     | 0.603           | 0.601      | 0.597     |
| p-value         | 0.538        | 0.888      | 0.349     | 0.829           | 0.220      | 0.811     | 0.390           | 0.411      | 0.395     |
| F2              |              |            |           |                 |            |           |                 |            |           |
| Coefficient     |              | -1.122     |           |                 | -1.489     |           |                 | 0.068      |           |
| p-value         |              | 0.013      |           |                 | 0.009      |           |                 | 0.936      |           |
| F4              |              |            |           |                 |            |           |                 |            |           |
| Coefficient     |              | -0.389     |           |                 | -1.498     |           |                 | -0.270     |           |
| p-value         |              | 0.511      |           |                 | 0.084      |           |                 | 0.808      |           |
| F3              |              |            |           |                 |            |           |                 |            |           |
| Coefficient     |              |            | -0.371    |                 |            | 0.068     |                 |            | -0.097    |
| p-value         |              |            | 0.352     |                 |            | 0.897     |                 |            | 0.876     |

Mixed Poisson models (one model per column) of the number of cells above the 95<sup>th</sup> percentile of the tail intensity (AST) as a function of factor scores of the exposure measurements adjusted on the temperature, gender and BMI (in three categories)
